# Supplementary material for: Source-resolved atmospheric metal emissions, concentrations, and deposition fluxes into the East Asian seas
Source: Copernicus journal article supplement (doi:10.5194/acp-24-8363-2024), 2024-07-25
Supplement: Supplementary file 1 [file acp-24-8363-2024-supplement.pdf]

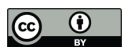

*Supplement of*

## **Source-resolved atmospheric metal emissions, concentrations, and deposition fluxes into the East Asian seas**

**Shenglan Jiang et al.**

*Correspondence to:* Yan Zhang ([yan\\_zhang@fudan.edu.cn](mailto:yan_zhang@fudan.edu.cn))

The copyright of individual parts of the supplement might differ from the article licence.

19 **Section S1. Technical details of the modified CMAQ.**

20 For the revisions of modules for simulate metals in CMAQ, we modified desid\_vars.F to add metals emission information.

21 To have tracers undergo the same diffusion, advection, and deposition as PM, we modified AERO\_DATA.F,

22 CMAQ\_Control\_DESID\_cb6r5\_ae7\_aq.nml, AE\_cb6r5\_ae7\_aq.nml files.

23 **Section S2. Technical details of the WRF/CMAQ.**

24 The WRF physics scheme configuration included the Pleim-Xiu land surface model (Xiu and Pleim, 2001), the Rapid

25 Radiative Transfer Model (RRTMG) for shortwave and longwave schemes (Clough et al., 2005), the Asymmetric

26 Convective Model version 2 for the PBL scheme (Pleim, 2007), the Kain–Fritsch cumulus scheme (Kain, 2004) for cumulus

27 parameterization, and the MODIS land cover data (20 categories) employed in this study. In the CMAQ model, two grids on

28 WRF lateral boundary were removed, and thus there were  $257 \times 117$  grids in d01.

29 **Section S3. Establishment of emission inventory of pollutants other than metals.**

30 For  $\text{SO}_2$ ,  $\text{NO}_x$ , CO, nonmethane volatile organic compounds (NMVOCs),  $\text{PM}_{10}$ ,  $\text{PM}_{2.5}$  and  $\text{NH}_3$ , we categorized them into

31 land anthropogenic and ship sources. For anthropogenic sources, we used the Multiresolution Emission Inventory for China

32 (MEIC) in 2020 (Li et al., 2017a; Zheng et al., 2018; Zheng et al., 2021) in mainland China and the MIX emission data in

33 2010 (Li et al., 2017b) in Asia excluding mainland China. For ship sources, we used A bottom-up ship emission model based

34 on the Automatic Identification System (AIS) data to calculate the emission inventories of these species. Detailed

35 information on the establishment of the ship emission model can be found in the previous studies (Chen et al., 2017; Fan et

36 al., 2016).

37

38 **Figure S1.** The simulation area.

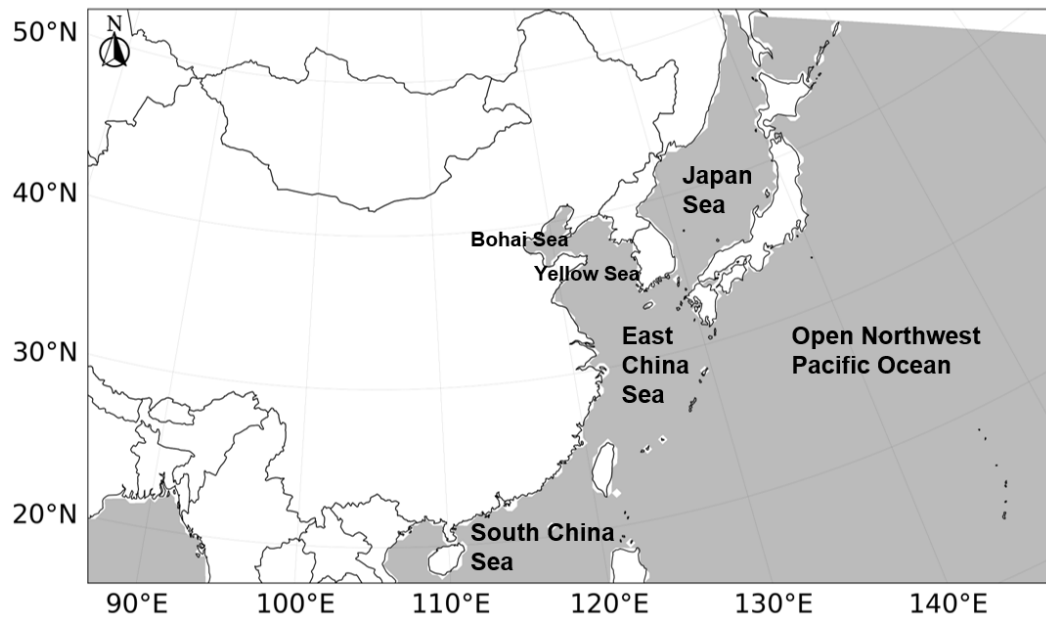

39  
40

41 **Figure S2.** Relative contributions of land anthropogenic, ship, and dust sources to fine mode (a), coarse mode (b) emissions  
 42 of the six metals (Fe, Al, V, Ni, Zn, Cu) in spring (March-April-May).

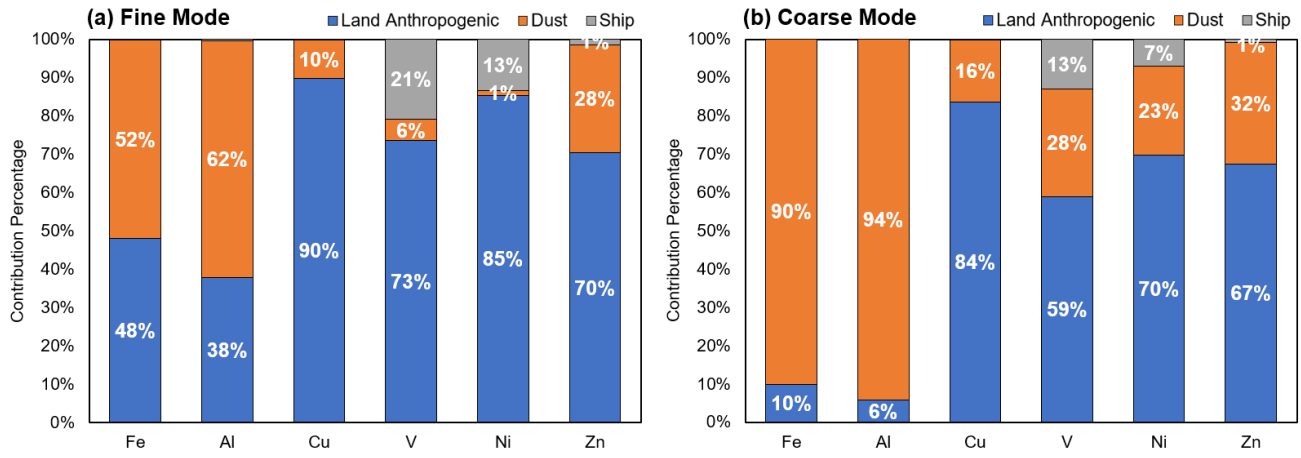

43

44

45 **Figure S3.** Absolute and relative contributions of seasonal mean concentrations of Fe (a) and Al (b) in different sea areas  
 46 from land anthropogenic, ship, and dust sources (units:  $\text{ng}\cdot\text{m}^{-3}$ ), the numbers on top of the stacked bar graphs represent total  
 47 seasonal mean concentrations from three sources.

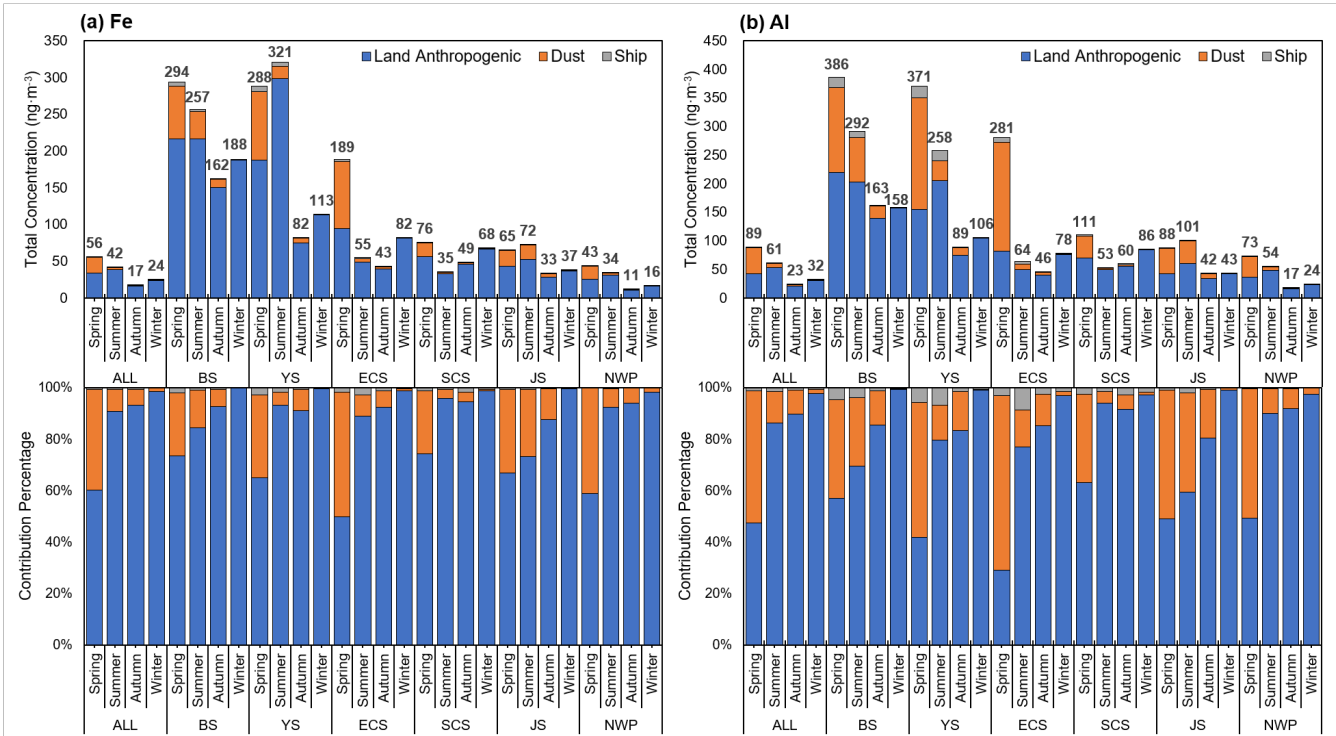

48

49

50 **Figure S4.** Comparison of simulated daily concentrations of V (a) and Ni (b) with observations at the Pudong site (31.2331°  
51 N, 121.5447° E, Shanghai, China).

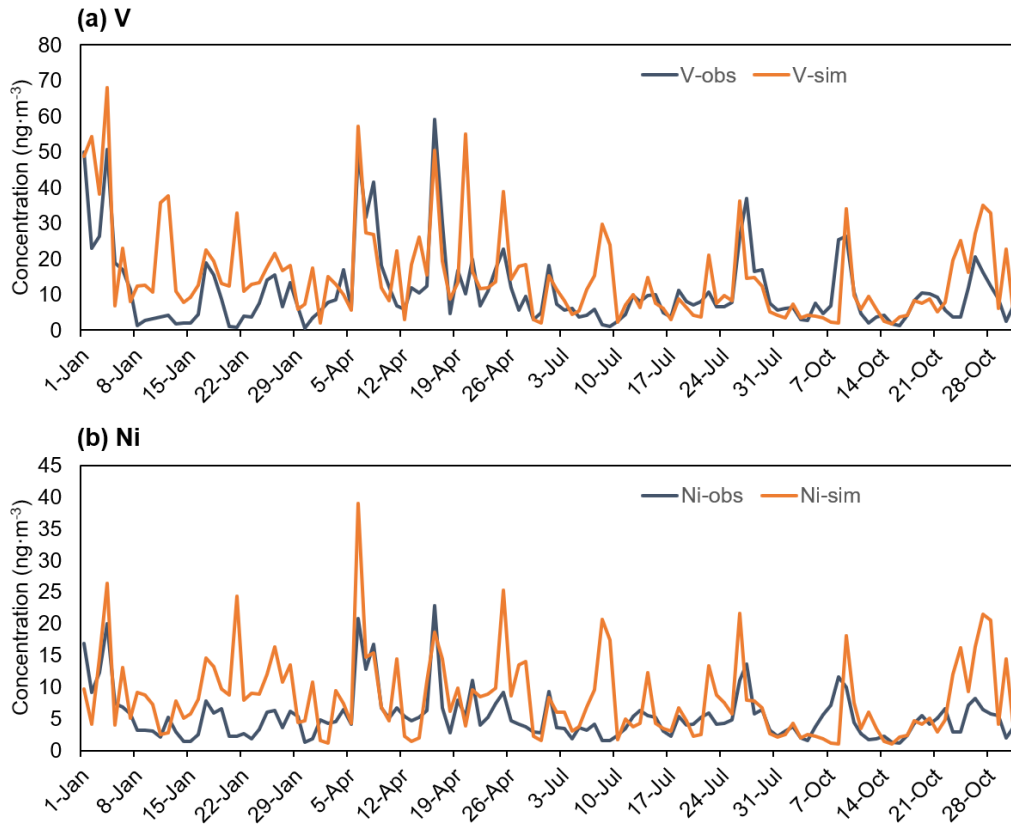

52

53

54 **Figure S5.** Spatial distribution of the contributions of land anthropogenic, dust sources and ship sources to the seasonal  
55 average concentrations of Fe (a-c), Al (d-f), V (g-i), Ni (j-l), Zn (m-o), and Cu (p-r) in the sea area, respectively (36 km × 36  
56 km resolution) in the year of 2017.

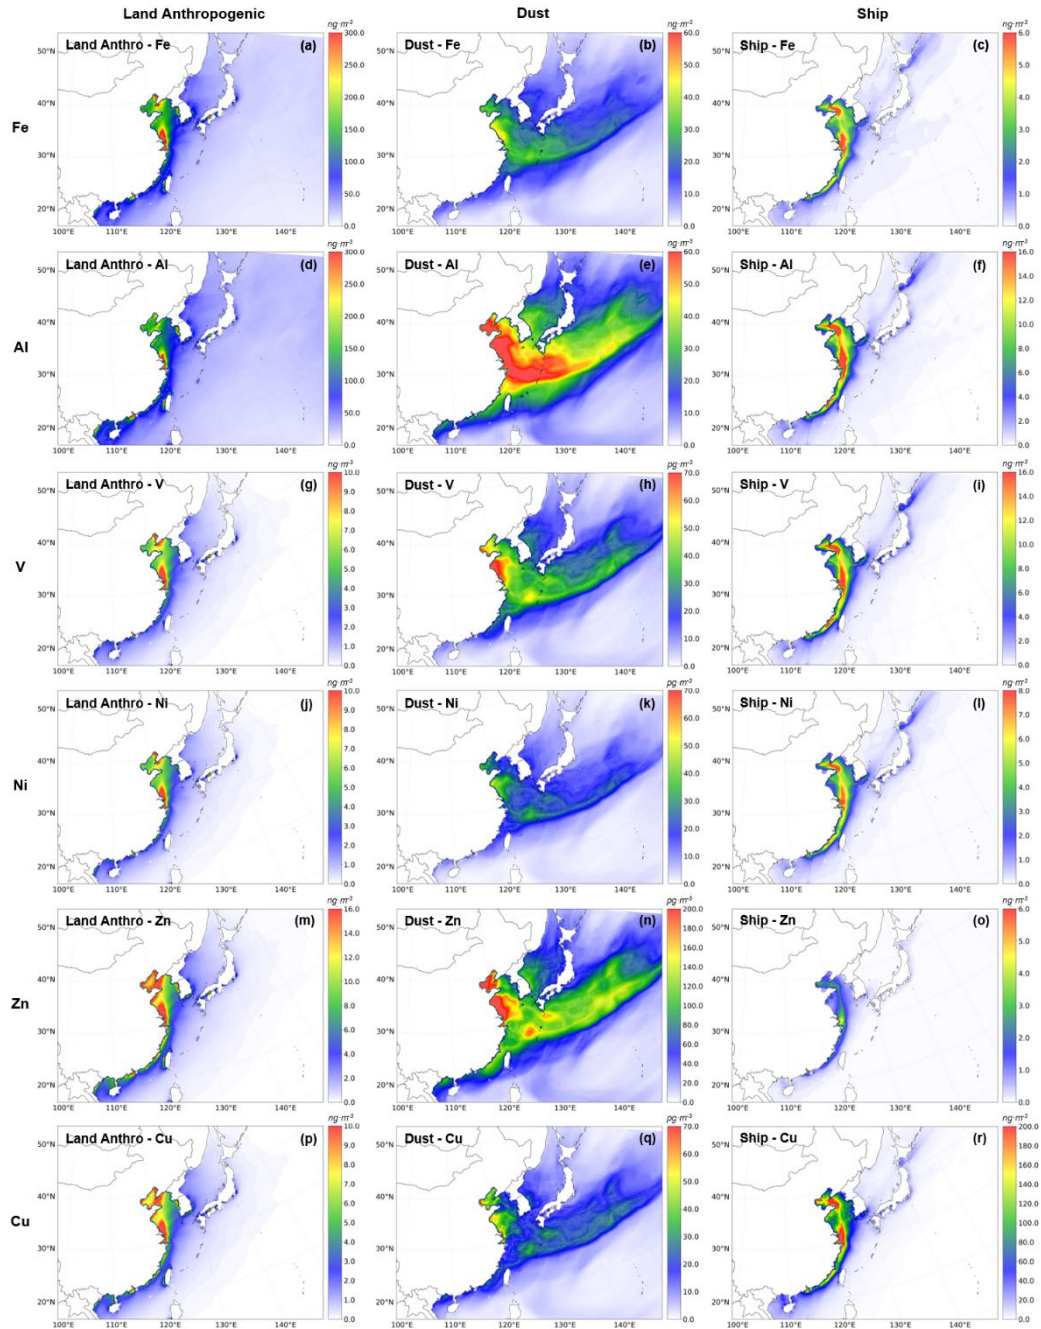

57  
58

59 **Figure S6.** Spatial distribution of depositional fluxes of Fe (a), V (b), Zn (c), Al (d), Ni (e), Cu (f) in the sea area (36 km × 36  
60 km resolution, considering all emission sources) in the year of 2017.

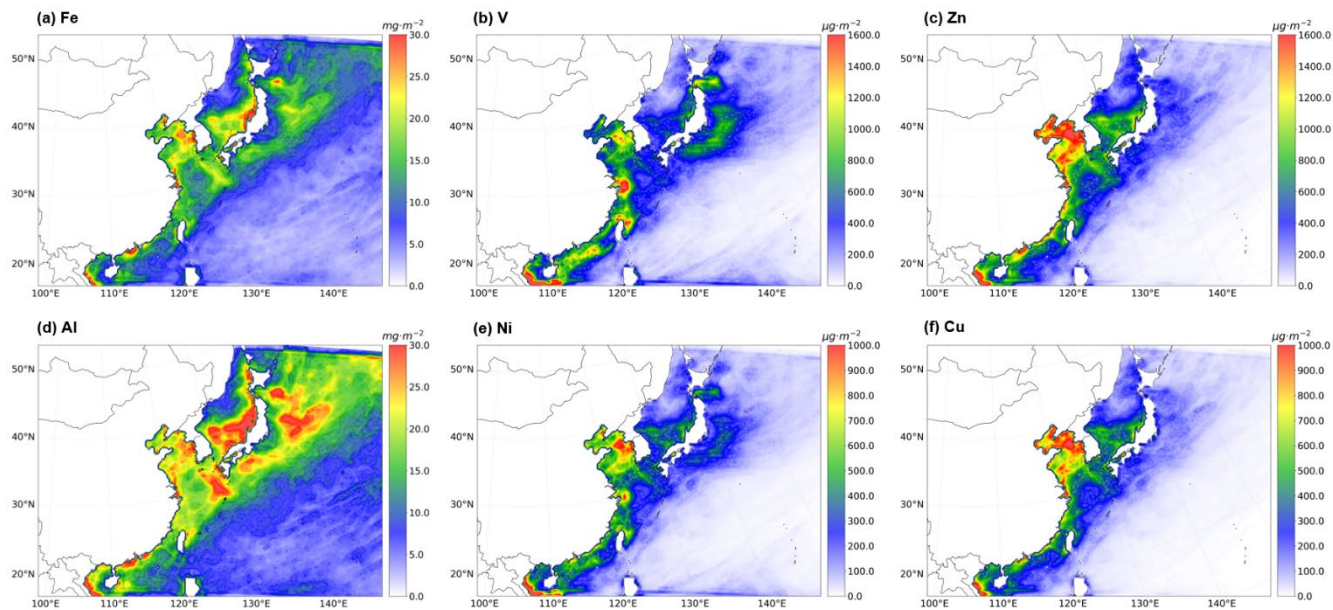

61  
62



63 **Figure S7.** Absolute and relative contributions of soluble iron deposition fluxes from land anthropogenic, ship, and dust  
 64 sources in different sea areas, fine mode (a), coarse mode (b) (units:  $\mu\text{g}\cdot\text{m}^{-2}\cdot\text{year}^{-1}$ ), the numbers on top of the stacked bar  
 65 graphs represent total deposition fluxes from three sources.

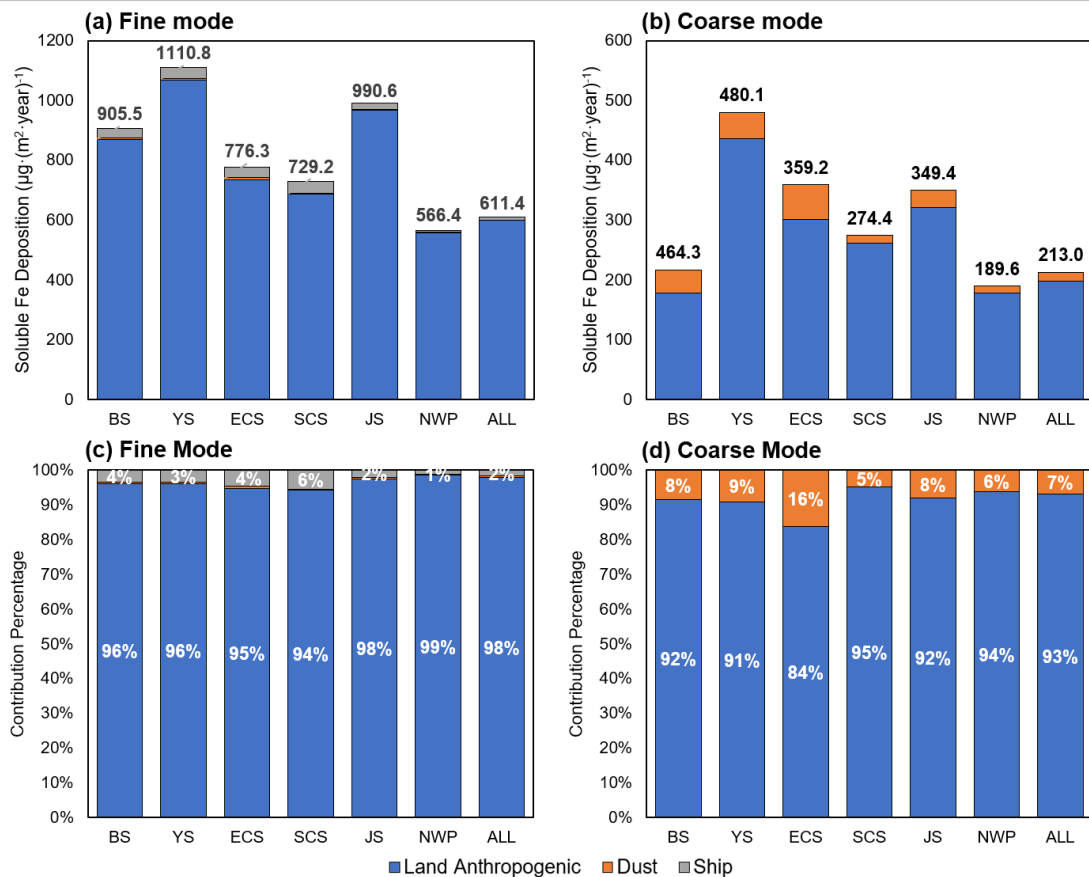

66

67

68 **Figure S8.** Evolution of the relative contributions of the land anthropogenic, ship, and dust sources to emissions, atmospheric  
 69 concentrations, and deposition fluxes of Fe (a), V (b), Zn (c), Al (d), Ni (e), Cu (f) for the month of April (Concentrations and  
 70 depositional fluxes labelled "Ocean" in the figure were for the oceans only, and concentrations and depositional fluxes labelled  
 71 "Land" were for land only).

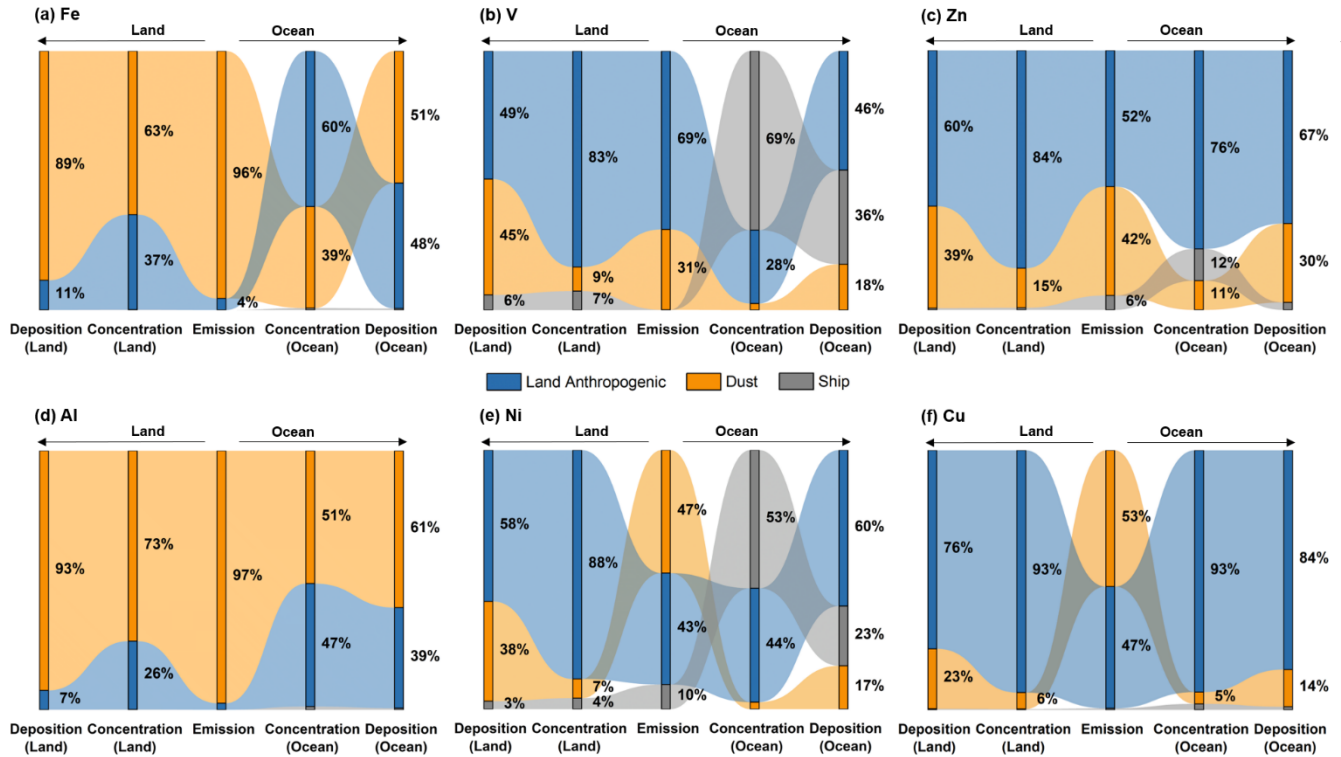

72

73

74 **Table S1.** Emission factors for ships in previous studies (Unit: g·kWh<sup>-1</sup>)

| Engine type | Fuel Type | Sulfur content (%) | Cu       | Fe       | V        | Ni       | Zn       | Al       | Source                    |
|-------------|-----------|--------------------|----------|----------|----------|----------|----------|----------|---------------------------|
| ME SSD      | HFO       | 2.70               | 1.80E-05 | 4.90E-03 | 1.94E-02 | 9.50E-03 | 1.30E-04 | 6.10E-04 | (Celo et al., 2015)       |
| ME SSD      | HFO       | 2.85               | 5.00E-05 | 6.75E-03 | 1.99E-02 | 8.69E-03 | 2.00E-04 | 1.87E-02 | (Agrawal et al., 2008a)   |
| ME SSD      | HFO       | 2.05               | 1.01E-04 | 3.89E-03 | 5.60E-02 | 1.27E-02 | 1.43E-04 | 1.72E-02 | (Agrawal et al., 2008b)   |
| ME MSD      | HFO       | 1.48               | 3.00E-06 | 4.10E-04 | 6.80E-03 | 2.43E-03 | 1.00E-04 | 2.30E-03 | (Celo et al., 2015)       |
| ME MSD      | HFO       | 2.21               | 3.00E-06 | 2.40E-03 | 1.23E-02 | 5.50E-03 | 8.00E-05 | 4.90E-04 |                           |
| ME MSD      | HFO       | 2.33               | 1.35E-05 | 2.22E-04 | 1.54E-03 | 2.91E-04 | 5.96E-05 | 1.37E-04 | (Corbin et al., 2018)     |
| ME MSD      | HFO       | 0.58               |          | 1.21E-04 | 4.27E-04 | 1.06E-03 | 6.50E-05 | 8.36E-05 | (Moldanová et al., 2013)  |
| ME MSD      | HFO       | 0.96               |          | 2.46E-04 | 1.69E-03 | 1.50E-03 | 6.63E-05 | 2.08E-05 |                           |
| ME MSD      | HFO       | 2.70               | 1.49E-04 | 1.27E-03 | 1.43E-02 | 4.10E-03 | 5.80E-04 | 1.79E-04 | (Sippula et al., 2014)    |
| ME MSD      | HFO       | 0.68               | 3.25E-05 | 1.55E-03 | 8.55E-06 | 1.62E-05 | 1.31E-04 |          | (Zhang et al., 2018a)     |
| ME MSD      | HFO       | 1.60               | 3.60E-04 | 5.30E-03 | 7.90E-03 | 2.00E-03 | 1.30E-03 | 2.60E-04 | (Streibel et al., 2017)   |
| ME MSD      | HFO       | 0.48               |          | 1.62E-02 | 3.60E-02 | 2.75E-01 | 1.08E-02 |          | (Zetterdahl et al., 2016) |
| ME MSD      | MDO       | 0.10               |          | 8.69E-06 | 3.80E-05 |          |          |          | (Moldanová et al., 2013)  |
| ME MSD      | MDO       | 0.13               |          | 2.29E-06 | 1.25E-04 | 1.70E-06 |          |          | (Zhang et al., 2016)      |
| ME HSD      | MDO       | 0.08               |          | 5.08E-05 | 4.25E-05 | 7.77E-05 |          |          |                           |
| AE MSD      | MGO       | 0.03               |          | 3.06E-06 | 1.43E-06 | 3.06E-06 | 2.45E-04 | 1.98E-04 | (Moldanová et al., 2013)  |
| AE MSD      | MGO       | 0.06               | 2.00E-05 | 1.40E-04 | 1.50E-04 | 4.00E-05 | 3.10E-04 | 3.00E-04 | (Agrawal et al., 2008a)   |

75

76 **Table S2.** Emission factors for ships used in this study (Unit: g·kWh<sup>-1</sup>)

| Engine type | Fuel Type | Sulfur content | Cu       | Fe       | V        | Ni       | Zn       | Al       |
|-------------|-----------|----------------|----------|----------|----------|----------|----------|----------|
| ME SSD      | HFO       | 2.7%           | 4.74E-05 | 5.12E-03 | 1.94E-02 | 9.50E-03 | 1.88E-04 | 1.77E-02 |
| ME MSD      | HFO       | 2.7%           | 7.27E-05 | 1.27E-03 | 1.24E-02 | 4.21E-03 | 3.03E-04 | 3.89E-04 |
|             | MDO       | 0.5%           | 1.67E-04 | 3.18E-04 | 2.66E-04 | 9.77E-05 | 3.33E-03 | 2.90E-03 |
| ME HSD      | MDO       | 0.5%           | 1.67E-04 | 6.09E-04 | 6.37E-04 | 1.92E-04 | 3.33E-03 | 2.90E-03 |
| AE MSD      | MGO       | 0.5%           | 1.67E-04 | 6.09E-04 | 6.37E-04 | 1.92E-04 | 3.33E-03 | 2.90E-03 |

77

78 **Table S3.** Dust metal emission factors in previous studies and applied in this study (Unit: %)

|        | Cu       | Fe       | V        | Ni       | Zn       | Al       | Source                   |
|--------|----------|----------|----------|----------|----------|----------|--------------------------|
| PM3    | 1.54E-04 |          | 9.22E-05 | 4.78E-05 | 1.35E-04 | 7.67E-02 | (Li et al., 2022)        |
| Coarse | 1.59E-05 |          | 6.33E-05 | 2.18E-05 | 7.16E-05 | 6.00E-02 |                          |
| Coarse | 4.71E-05 | 2.44E-02 | 6.95E-05 | 5.10E-05 | 1.20E-04 |          | (Luo et al., 2022)       |
| Coarse | 3.00E-05 | 2.35E-02 | 6.38E-05 | 4.20E-05 | 8.70E-05 |          |                          |
| Coarse | 4.77E-05 | 3.78E-02 |          | 7.03E-05 | 1.93E-04 | 4.09E-02 | (Abbasi et al., 2021)    |
| Coarse | 3.80E-05 | 3.80E-02 |          | 7.00E-05 | 1.45E-04 | 4.10E-02 |                          |
| Coarse |          | 2.86E-02 |          |          |          | 6.03E-02 | (Baker et al., 2020)     |
| Coarse | 3.41E-05 | 3.84E-02 |          | 2.91E-05 | 9.31E-05 | 7.58E-02 | (Nishikawa et al., 2013) |
| Coarse | 5.00E-05 | 7.70E-02 | 5.00E-04 | 1.00E-04 | 1.00E-04 | 8.40E-02 | (Desboeufs et al., 2005) |
| Coarse | 1.00E-05 | 2.44E-02 | 3.00E-05 | 6.70E-05 | 1.60E-04 | 7.84E-02 |                          |
| Fine   | 1.77E-04 | 3.36E-02 | 1.16E-04 | 5.70E-05 | 1.32E-03 | 5.70E-02 | Applied in this study    |
| Coarse | 3.36E-05 | 3.24E-02 | 6.36E-05 | 5.10E-05 | 9.93E-05 | 6.86E-02 |                          |

79

80 **Table S4.** Solubility of metals in previous studies and applied in this study (Unit: %)

| Mode   |       | Cu     | Fe     | V      | Ni     | Zn     | Al     | Source                     |
|--------|-------|--------|--------|--------|--------|--------|--------|----------------------------|
| Fine   | Total | 0.6146 | 0.232  | 0.6842 | 0.41   | 0.8608 | 0.1404 | (Jiang et al., 2014)       |
|        |       | 0.1643 |        | 0.4342 | 0.1314 | 0.6678 |        | (Wang et al., 2015)        |
|        |       | 0.349  | 0.046  |        | 0.068  | 0.413  |        | (Liu et al., 2022)         |
|        |       | 0.5769 | 0.4667 | 0.421  | 0.568  | 0.7    |        | (Karthikeyan et al., 2006) |
|        |       | 0.51   | /      | 0.43   | 0.49   | 0.73   | 0.14   | Applied in this study      |
| Coarse | Total | 0.41   | 0.027  | -      | -      | 0.816  | 0.0472 | (Jiang et al., 2014)       |
|        |       | 0.51   | 0.077  | 0.55   | 0.26   | 0.84   | 0.051  | (Hsu et al., 2010)         |
|        |       | 0.47   | 0.012  | 0.262  |        | 0.463  |        | (Wang et al., 2015)        |
|        |       | 0.41   | 0.274  | 0.326  | 0.284  | 0.423  |        | (Karthikeyan et al., 2006) |
|        |       | 0.14   | 0.066  |        | 0.12   | 0.57   | 0.45   | (Jickells et al., 2016)    |
|        |       | 0.45   | /      | 0.38   | 0.27   | 0.62   | 0.049  | Applied in this study      |
| Fine   | Dust  |        | 0.01   |        |        |        |        | (Kurusu et al., 2021)      |
|        | Land  |        | 0.08   |        |        |        |        | (Ito, 2015)                |
|        | Ship  |        | 0.65   |        |        |        |        |                            |
| Coarse | Dust  |        | 0.017  |        |        |        |        | (Ooki et al., 2009)        |
|        | Land  |        | 0.025  |        |        |        |        | (Baker et al., 2020)       |

81

82 **Table S5.** Monthly metal emissions from ship sources in 2017 (Unit: tons·month<sup>-1</sup>)

| Month | Cu     | Fe      | V        | Ni      | Zn      | Al       |
|-------|--------|---------|----------|---------|---------|----------|
| Jan   | 1.1825 | 34.6850 | 129.0917 | 61.7265 | 18.2189 | 121.8235 |
| Feb   | 1.1118 | 31.7941 | 118.4216 | 56.1886 | 17.2285 | 111.6897 |
| Mar   | 1.3335 | 36.7252 | 136.4392 | 64.6687 | 20.8952 | 129.2200 |
| Apr   | 1.4518 | 41.3125 | 153.5250 | 72.8817 | 22.5648 | 145.2409 |
| May   | 1.4068 | 43.3444 | 162.0243 | 77.0775 | 21.3147 | 151.9547 |

|      |         |          |           |          |          |           |
|------|---------|----------|-----------|----------|----------|-----------|
| Jun  | 1.2169  | 36.9126  | 137.9572  | 65.5797  | 18.5189  | 129.4294  |
| July | 1.5311  | 45.1684  | 169.1841  | 80.2542  | 23.4339  | 158.3524  |
| Aug  | 1.5608  | 43.9847  | 164.3985  | 77.8443  | 24.2096  | 154.3517  |
| Sep  | 1.2467  | 34.1564  | 127.2538  | 60.1975  | 19.5106  | 119.8588  |
| Oct  | 1.5415  | 43.1018  | 161.1650  | 76.1933  | 23.9349  | 150.8402  |
| Nov  | 1.6353  | 45.4896  | 170.3909  | 80.4884  | 25.3904  | 159.1439  |
| Dec  | 1.6341  | 46.1274  | 172.7453  | 81.6644  | 25.2818  | 161.3140  |
| Sum  | 16.8529 | 482.8020 | 1802.5965 | 854.7649 | 260.5023 | 1693.2192 |

83

84 **Table S6.** Monthly fine mode metal emissions from land anthropogenic sources in 2017 (Unit: tons·month<sup>-1</sup>)

| Month | Cu      | Fe        | V       | Ni      | Zn       | Al        |
|-------|---------|-----------|---------|---------|----------|-----------|
| Jan   | 626.35  | 11077.53  | 566.88  | 517.94  | 1373.93  | 13178.09  |
| Feb   | 538.29  | 10242.82  | 523.12  | 453.34  | 1112.31  | 11625.46  |
| Mar   | 551.13  | 10499.15  | 516.35  | 449.68  | 1115.10  | 12020.72  |
| Apr   | 543.95  | 10296.52  | 539.68  | 457.48  | 1069.83  | 11301.25  |
| May   | 533.11  | 10285.04  | 530.53  | 448.49  | 1056.53  | 11501.22  |
| Jun   | 529.13  | 10342.16  | 527.65  | 446.97  | 1055.52  | 11647.78  |
| July  | 517.53  | 10288.07  | 535.65  | 445.04  | 1053.97  | 12082.21  |
| Aug   | 511.01  | 10185.41  | 513.17  | 429.63  | 1047.99  | 12167.32  |
| Sep   | 527.01  | 10223.80  | 505.84  | 432.51  | 1051.61  | 11659.44  |
| Oct   | 549.53  | 10486.76  | 542.89  | 458.17  | 1091.11  | 11977.92  |
| Nov   | 557.35  | 10560.46  | 541.44  | 464.38  | 1127.93  | 12093.87  |
| Dec   | 594.54  | 10952.06  | 551.70  | 490.91  | 1251.36  | 12789.79  |
| Sum   | 6578.94 | 125439.79 | 6394.90 | 5494.52 | 13407.19 | 144045.08 |

85

86 **Table S7.** Monthly coarse mode metal emissions from land anthropogenic sources in 2017 (Unit: tons·month<sup>-1</sup>)

| Month | Cu      | Fe       | V       | Ni      | Zn      | Al       |
|-------|---------|----------|---------|---------|---------|----------|
| Jan   | 461.51  | 7255.44  | 139.25  | 879.44  | 685.35  | 8324.76  |
| Feb   | 493.37  | 6678.36  | 147.77  | 354.98  | 714.29  | 8011.84  |
| Mar   | 534.38  | 6955.81  | 150.49  | 302.30  | 750.38  | 8052.39  |
| Apr   | 564.46  | 6757.91  | 154.73  | 230.91  | 775.96  | 8500.91  |
| May   | 547.67  | 6644.82  | 152.76  | 208.55  | 768.33  | 8327.12  |
| Jun   | 534.57  | 6585.42  | 151.23  | 208.17  | 766.45  | 8269.86  |
| July  | 512.16  | 6792.39  | 149.71  | 209.89  | 758.49  | 8023.75  |
| Aug   | 503.29  | 6787.56  | 148.34  | 208.26  | 743.85  | 7694.13  |
| Sep   | 540.66  | 6842.74  | 151.52  | 208.03  | 766.84  | 7932.16  |
| Oct   | 565.57  | 7131.48  | 154.42  | 235.22  | 784.64  | 8390.68  |
| Nov   | 539.02  | 7079.40  | 151.42  | 312.63  | 757.12  | 8270.60  |
| Dec   | 499.86  | 7126.84  | 145.26  | 563.84  | 713.47  | 8339.15  |
| Sum   | 6296.51 | 82638.16 | 1796.88 | 3922.21 | 8985.18 | 98137.34 |

87

88 **Table S8.** Monthly fine mode metal emissions from dust sources in 2017 (Unit: tons·month<sup>-1</sup>)

| Month | Cu     | Fe       | V     | Ni    | Zn      | Al       |
|-------|--------|----------|-------|-------|---------|----------|
| Jan   | 3.65   | 680.75   | 2.43  | 0.41  | 26.38   | 1155.55  |
| Feb   | 21.75  | 4054.75  | 14.50 | 2.42  | 157.11  | 6882.81  |
| Mar   | 2.27   | 423.72   | 1.52  | 0.25  | 16.42   | 719.25   |
| Apr   | 142.17 | 26499.65 | 94.78 | 15.80 | 1026.81 | 44982.26 |
| May   | 36.11  | 6730.91  | 24.07 | 4.01  | 260.81  | 11425.49 |
| Jun   | 5.84   | 1088.05  | 3.89  | 0.65  | 42.16   | 1846.92  |
| July  | 43.86  | 8174.67  | 29.24 | 4.87  | 316.75  | 13876.23 |
| Aug   | 10.20  | 1901.40  | 6.80  | 1.13  | 73.68   | 3227.55  |
| Sep   | 18.53  | 3453.22  | 12.35 | 2.06  | 133.81  | 5861.73  |

|     |        |          |        |       |         |          |
|-----|--------|----------|--------|-------|---------|----------|
| Oct | 15.09  | 2811.89  | 10.06  | 1.68  | 108.96  | 4773.09  |
| Nov | 0.88   | 164.37   | 0.59   | 0.10  | 6.37    | 279.00   |
| Dec | 15.00  | 2796.45  | 10.00  | 1.67  | 108.36  | 4746.88  |
| Sum | 315.36 | 58779.82 | 210.24 | 35.04 | 2277.61 | 99776.76 |

89

90 **Table S9.** Monthly coarse mode metal emissions from dust sources in 2017 (Unit: tons·month<sup>-1</sup>)

| Month | Cu     | Fe        | V       | Ni      | Zn      | Al         |
|-------|--------|-----------|---------|---------|---------|------------|
| Jan   | 9.17   | 8734.20   | 17.25   | 13.75   | 26.69   | 18492.78   |
| Feb   | 54.59  | 52023.79  | 102.76  | 81.89   | 158.96  | 110149.13  |
| Mar   | 5.70   | 5436.48   | 10.74   | 8.56    | 16.61   | 11510.56   |
| Apr   | 356.79 | 339998.86 | 671.60  | 535.18  | 1038.89 | 719874.11  |
| May   | 90.62  | 86359.67  | 170.59  | 135.94  | 263.88  | 182847.93  |
| Jun   | 14.65  | 13959.97  | 27.58   | 21.97   | 42.66   | 29557.21   |
| July  | 110.06 | 104883.59 | 207.18  | 165.09  | 320.48  | 222068.34  |
| Aug   | 25.60  | 24395.50  | 48.19   | 38.40   | 74.54   | 51652.20   |
| Sep   | 46.49  | 44305.93  | 87.52   | 69.74   | 135.38  | 93808.24   |
| Oct   | 37.86  | 36077.48  | 71.26   | 56.79   | 110.24  | 76386.26   |
| Nov   | 2.21   | 2108.86   | 4.17    | 3.32    | 6.44    | 4465.05    |
| Dec   | 37.65  | 35879.35  | 70.87   | 56.48   | 109.63  | 75966.76   |
| Sum   | 791.41 | 754163.67 | 1489.71 | 1187.11 | 2304.39 | 1596778.58 |

91



92 **Table S10.** Comparison of metals emission inventories with other studies (Units: tons·year<sup>-1</sup>)

| Area      | Emission Source               | Period | V       | V-this study <sup>a</sup> | Ni     | Ni-this study | Zn      | Zn-this study | Cu     | Cu-this study | Source                           |
|-----------|-------------------------------|--------|---------|---------------------------|--------|---------------|---------|---------------|--------|---------------|----------------------------------|
| China     | Solid Waste                   | 2013   |         |                           | 43.5   | 27.9          | 1790.7  | 2194.0        | 382.4  | 185.6         | (Wang et al., 2017) <sup>b</sup> |
|           | solid waste incineration      |        | 0.27    | 0.67                      |        |               |         |               |        |               |                                  |
|           | No-road transport             |        | 1247.0  | 1803.7                    |        |               |         |               |        |               |                                  |
| China     | Iron and steel production     | 2017   | 79.6    | 109.2                     |        |               |         |               |        |               | (Bai et al., 2021) <sup>c</sup>  |
|           | Domestic coal combustion      |        | 10.5    | 75.6                      |        |               |         |               |        |               |                                  |
|           | Total                         |        | 11505.0 | 16394.8                   |        |               |         |               |        |               |                                  |
| China     | iron and steel industry       | 2011   |         |                           | 105.0  | 196.1         |         |               | 448.8  | 528.5         | (Wang et al., 2016)              |
| East Asia | Ship                          | 2015   | 1329.8  | 1802.6                    | 580.4  | 854.8         |         |               |        |               | (Zhao et al., 2021) <sup>c</sup> |
| China     | primary anthropogenic sources | 2012   |         |                           | 3395.5 | 5458.0        | 22319.6 | 22526.9       | 9547.6 | 12793.1       | (Tian et al., 2015)              |
| China     | primary anthropogenic sources | 2017   |         |                           |        |               | 19473.1 | 22526.9       | 9813.1 | 12793.1       | (Liu et al., 2023)               |

93

94 **Table S11.** Comparison of mean annual concentration of metals in PM<sub>2.5</sub> from other studies (Units: ng·m<sup>-3</sup>)

| Area | Periods | Longitude | Latitude | Cu | Fe | V | Ni | Zn | Al | Source |
|------|---------|-----------|----------|----|----|---|----|----|----|--------|
|------|---------|-----------|----------|----|----|---|----|----|----|--------|

|              |           |          |         |       |         |       |      |        |        |                       |
|--------------|-----------|----------|---------|-------|---------|-------|------|--------|--------|-----------------------|
| East Asia    | 2017      |          |         | 3.55  | 112.56  | 4.38  | 3.25 | 33.02  | 135.78 | This study            |
| Shanghai     | 2018-2019 | 120.97°E | 31.09°N | 3.85  | 194.5   | 5.54  | 3.18 | 40.84  | 400.1  | (Zou et al., 2020)    |
| Beijing      | 2010      | 116.30°E | 39.99°N | 34    | 1696    | 4     | 4    | 270    | 1823   | (Tao et al., 2016)    |
| Chengdu      | 2011      | 104.7°E  | 30.65°N | 23    | 693     | 1.7   | 2.5  | 350    | 560    | (Tao et al., 2014)    |
| Guangzhou    | 2014      | 113.35°E | 23.12°N | 37    | 353     | 9     | 4    | 225    | 305    | (Tao et al., 2017)    |
| Gunshan      | 2012-2013 | 126.71°E | 35.98°N | 29    | 237     | -     | 13   | 113    | 166    | (Jeon et al., 2012)   |
| Handan       | 2013      | 114.50°E | 36.69°N | 18.8  | -       | 5.4   | 3.4  | 300    | -      | (Wei et al., 2014)    |
| Hangzhou     | 2005      | 120.15°E | 30.28°N | 71    | -       | -     | 3    | 130    | -      | (Liu et al., 2015)    |
| Jinan        | 2007      | 116.98°E | 36.67°N | 30    | 1300    | 7.35  | 9.05 | 700    | 890    | (Zhang et al., 2018b) |
| Lanzhou      | 2012-2013 | 103.81°E | 36.03°N | 47.06 | -       | 7.97  | 9.4  | 322    | -      | (Tan et al., 2017)    |
| Nanjing      | 2013      | 118.76°E | 32.05°N | 71.5  | 902     | 5.19  | 16   | 497    | 811.5  | (Li et al., 2016)     |
| Niigata      | 2016      | 138.86°E | 37.80°N | 2.14  | 82.4    | 1.13  | 6.06 | 10.9   | 144    | (Li et al., 2018)     |
| Qingdao      | 2007      | 120.38°E | 36.07°N | 20    | 630     | 9.99  | 6.24 | 270    | 470    | (Zhang et al., 2018b) |
| Shanghai     | 2010      | 121.53°E | 31.22°N | 15    | 1328    | -     | 9    | 236    | 1542   | (Wang et al., 2013)   |
| Taian        | 2014      | 117.11°E | 36.18°N | 40    | 1055    | -     | 10   | 220    | 350    | (Liu et al., 2016)    |
| Tianjin      | 2008      | 117.20°E | 39.12°N | 38.9  | 145.1   | 2.2   | -    | 339.4  | 69.8   | (Gu et al., 2011)     |
| Tuoji-island | 2012      | 120.76°E | 38.17°N | 12.6  | 466     | 6     | 4    | 94.3   | -      | (Zhang et al., 2014)  |
| Wuhan        | 2013      | 114.21°E | 30.30°N | 25.27 | 1680    | -     | 4.8  | 290.78 | -      | (Zhang et al., 2015)  |
| Wuhan        | 2014      | 114.17°E | 30.36°N | 30.13 | 1820.76 | 6.35  | 3.57 | 419.21 | -      | (Acciai et al., 2017) |
| Xiamen       | 2015      | 118.03°E | 24.30°N | 26    | 250     | 10.95 | 5.37 | 220    | 280    | (Zhuang, 2016)        |

|                       |      |          |         |      |        |      |      |       |       |                       |
|-----------------------|------|----------|---------|------|--------|------|------|-------|-------|-----------------------|
| Zaozhuang             | 2007 | 117.32°E | 34.82°N | 40   | 1000   | 6.11 | 9.85 | 1220  | 630   | (Zhang et al., 2018b) |
| Zhengzhou             | 2010 | 113.51°E | 34.80°N | 24.1 | 1248.8 | 3.7  | 3.3  | 444.1 | 579.6 | (Geng et al., 2013)   |
| Zhuhai                | 2014 | 113.53°E | 22.36°N | 20   | 212    | 12   | 7    | 149   | 309   | (Tao et al., 2017)    |
| the East<br>China Sea |      |          |         | 58   | 410    | 3.8  | 1.5  | 51    | 615   | (Hsu et al., 2010)    |

95

96 **Table S12.** Comparison of mean annual deposition flux of metals from other studies (Units:  $\text{mg}\cdot\text{m}^{-2}\cdot\text{year}^{-1}$ )

| Area           | Periods            | Cu    | Fe     | V    | Ni    | Zn     | Al     | Source                |
|----------------|--------------------|-------|--------|------|-------|--------|--------|-----------------------|
| East Asia      | 2017               | 0.55  | 62.20  | 0.42 | 0.47  | 1.05   | 119.43 | This study            |
| China          | 2000-2018          | 12.77 |        |      | 6.61  | 96.75  |        | (Chen et al., 2022)   |
| North China    | 2008-2018          | 16.30 |        |      | 16.40 | 129.80 |        | (Peng et al., 2019)   |
| South China    | 2008-2019          | 18.80 |        |      | 4.89  | 88.60  |        |                       |
| Tokyo Bay      | 2004-2005          | 16.00 |        | 6.90 | 6.80  |        |        | (Sakata et al., 2008) |
| Kushiro        | 2008               | 0.57  | 70.81  |      | 0.72  | 4.02   | 146.00 |                       |
|                |                    | 0.11  | 20.55  | 0.23 | 0.14  | 0.02   | 35.97  |                       |
| Otsuchi        | 2008               | 2.21  | 204.77 |      | 0.74  | 14.60  | 356.61 | (Okubo et al., 2013)  |
|                |                    | 0.24  | 47.39  | 0.52 | 0.29  | 0.05   | 90.17  |                       |
| Hedo           | 2008               | 0.35  | 62.05  |      | 0.80  | 5.48   | 105.12 |                       |
|                |                    | 0.33  | 20.20  | 0.62 | 0.47  | 0.06   | 33.29  |                       |
| Pearl<br>Delta | River<br>2001-2002 | 18.60 | 555.00 | 2.09 | 8.35  | 104.00 |        | (Wong et al., 2003)   |
| China          | 2006-2015          | 11.56 |        |      | 8.08  | 72.90  |        | (Ni and Ma, 2018)     |

|                 |           |       |         |      |      |        |         |                               |
|-----------------|-----------|-------|---------|------|------|--------|---------|-------------------------------|
| Spain           | 2004-2006 | 0.79  | 347.00  |      | 0.65 | 6.26   | 457.00  | (Bacardit and Camarero, 2009) |
| Jiangsu         | 2019      | 11.00 |         |      | 3.30 | 157.00 |         | (Chen et al., 2019)           |
| Northern China  | 2007-2010 | 15.10 | 3957.10 | 5.35 | 7.87 | 106.50 | 5046.50 | (Pan and Wang, 2015)          |
| Guizhou         | 2018      | 1.22  |         |      |      | 30.27  |         | (Lin et al., 2022)            |
|                 |           | 0.41  | 30.46   | 0.80 | 0.54 | 0.11   | 49.08   |                               |
| Beijing         | 2016-2020 |       |         | 0.16 | 0.53 | 6.18   |         | (Pan et al., 2021)            |
|                 |           | 0.46  | 118.69  | 1.00 | 0.55 | 0.11   | 240.99  |                               |
| Hunan           | 2016-2018 | 6.41  |         |      | 1.57 | 73.09  |         | (Feng et al., 2019)           |
|                 |           | 0.41  | 28.60   | 0.77 | 0.55 | 0.10   | 47.03   |                               |
| Mount Emei      | 2017-2022 | 1.70  | 6.93    |      |      | 41.40  | 6.38    | (Fu et al., 2023)             |
| Daya Bay, China | 2015-2017 | 4.67  | 209.37  | 2.41 | 1.91 | 93.96  | 477.40  | (Wu et al., 2018)             |
|                 |           | 0.47  | 29.78   | 0.95 | 0.66 | 0.20   | 45.07   |                               |
| Lushan          | 2011-2012 | 6.29  | 0.00    | 9.99 | 2.94 | 112.87 | 854.40  | (Nie et al., 2017)            |
|                 |           | 0.41  | 18.24   | 0.68 | 0.56 | 0.06   | 30.44   |                               |

## 98 References

- 99 Abbasi, S., Rezaei, M., Keshavarzi, B., Mina, M., Ritsema, C., and Geissen, V.: Investigation of the 2018 Shiraz dust event:  
100 Potential sources of metals, rare earth elements, and radionuclides; health assessment, *Chemosphere*, 279, 130533,  
101 10.1016/j.chemosphere.2021.130533, 2021.
- 102 Acciai, C., Zhang, Z., Wang, F., Zhong, Z., and Lonati, G.: Characteristics and Source Analysis of Trace Elements in PM<sub>2.5</sub>  
103 in the Urban Atmosphere of Wuhan in Spring, *Aerosol and Air Quality Research*, 17, 2224-2234,  
104 10.4209/aaqr.2017.06.0207, 2017.
- 105 Agrawal, H., Welch, W. A., Miller, J. W., and Cocker, D. R.: Emission Measurements from a Crude Oil Tanker at Sea,  
106 *Environmental Science & Technology*, 42, 7098-7103, 10.1021/es703102y, 2008a.
- 107 Agrawal, H., Malloy, Q. G. J., Welch, W. A., Wayne Miller, J., and Cocker, D. R.: In-use gaseous and particulate matter  
108 emissions from a modern ocean going container vessel, *Atmospheric Environment*, 42, 5504-5510,  
109 10.1016/j.atmosenv.2008.02.053, 2008b.
- 110 Bacardit, M. and Camarero, L.: Fluxes of Al, Fe, Ti, Mn, Pb, Cd, Zn, Ni, Cu, and As in monthly bulk deposition over the  
111 Pyrenees (SW Europe): The influence of meteorology on the atmospheric component of trace element cycles and its  
112 implications for high mountain lakes, *Journal of Geophysical Research: Biogeosciences*, 114, 10.1029/2008JG000732,  
113 2009.
- 114 Bai, X., Luo, L., Tian, H., Liu, S., Hao, Y., Zhao, S., Lin, S., Zhu, C., Guo, Z., and Lv, Y.: Atmospheric Vanadium Emission  
115 Inventory from Both Anthropogenic and Natural Sources in China, *Environmental Science & Technology*, 55, 11568-  
116 11578, 10.1021/acs.est.1c04766, 2021.
- 117 Baker, A. R., Li, M., and Chance, R.: Trace Metal Fractional Solubility in Size-Segregated Aerosols From the Tropical Eastern  
118 Atlantic Ocean, *Global Biogeochemical Cycles*, 34, e2019GB006510, 10.1029/2019GB006510, 2020.
- 119 Celso, V., Dabek-Zlotorzynska, E., and McCurdy, M.: Chemical Characterization of Exhaust Emissions from Selected  
120 Canadian Marine Vessels: The Case of Trace Metals and Lanthanoids, *Environmental Science & Technology*, 49, 5220-  
121 5226, 10.1021/acs.est.5b00127, 2015.
- 122 Chen, D., Wang, X., Li, Y., Lang, J., Zhou, Y., Guo, X., and Zhao, Y.: High-spatiotemporal-resolution ship emission inventory  
123 of China based on AIS data in 2014, *Science of The Total Environment*, 609, 776-787, 10.1016/j.scitotenv.2017.07.051,  
124 2017.
- 125 Chen, L., Zhou, S., Wu, S., Wang, C., and He, D.: Concentration, fluxes, risks, and sources of heavy metals in atmospheric  
126 deposition in the Lihe River watershed, Taihu region, eastern China, *Environmental Pollution*, 255, 113301,  
127 10.1016/j.envpol.2019.113301, 2019.

128 Chen, Q., Gao, Y., Ni, R., Pan, Y., Yan, Y., Yang, J., Liu, X., and Gu, X.: Temporal and Spatial Variation Characteristics of  
129 Heavy Metal in Atmospheric Deposition in China from 2000 to 2018, *Environmental Science*, 43,  
130 10.13227/j.hjcx.202201135, 2022.

131 Clough, S. A., Shephard, M. W., Mlawer, E. J., Delamere, J. S., Iacono, M. J., Cady-Pereira, K., Boukabara, S., and Brown,  
132 P. D.: Atmospheric radiative transfer modeling: a summary of the AER codes, *Journal of Quantitative Spectroscopy and*  
133 *Radiative Transfer*, 91, 233-244, 10.1016/j.jqsrt.2004.05.058, 2005.

134 Corbin, J. C., Mensah, A. A., Pieber, S. M., Orasche, J., Michalke, B., Zanatta, M., Czech, H., Massabò, D., Buatier de Mongeot,  
135 F., Mennucci, C., El Haddad, I., Kumar, N. K., Stengel, B., Huang, Y., Zimmermann, R., Prévôt, A. S. H., and Gysel, M.:  
136 Trace Metals in Soot and PM<sub>2.5</sub> from Heavy-Fuel-Oil Combustion in a Marine Engine, *Environmental Science &*  
137 *Technology*, 52, 6714-6722, 10.1021/acs.est.8b01764, 2018.

138 Desboeufs, K. V., Sofikitis, A., Losno, R., Colin, J. L., and Ausset, P.: Dissolution and solubility of trace metals from natural  
139 and anthropogenic aerosol particulate matter, *Chemosphere*, 58, 195-203, 10.1016/j.chemosphere.2004.02.025, 2005.

140 Fan, Q., Zhang, Y., Ma, W., Ma, H., Feng, J., Yu, Q., Yang, X., Ng, S. K. W., Fu, Q., and Chen, L.: Spatial and Seasonal  
141 Dynamics of Ship Emissions over the Yangtze River Delta and East China Sea and Their Potential Environmental  
142 Influence, *Environmental Science & Technology*, 50, 1322-1329, 10.1021/acs.est.5b03965, 2016.

143 Feng, W., Guo, Z., Peng, C., Xiao, X., Shi, L., Zeng, P., Ran, H., and Xue, Q.: Atmospheric bulk deposition of heavy  
144 metal(loid)s in central south China: Fluxes, influencing factors and implication for paddy soils, *Journal of Hazardous*  
145 *Materials*, 371, 634-642, 10.1016/j.jhazmat.2019.02.090, 2019.

146 Fu, Y., Tang, Y., Shu, X., Hopke, P. K., He, L., Ying, Q., Xia, Z., Lei, M., and Qiao, X.: Changes of atmospheric metal(loid)  
147 deposition from 2017 to 2021 at Mount Emei under China's air pollution control strategy, *Atmospheric Environment*, 302,  
148 119714, 10.1016/j.atmosenv.2023.119714, 2023.

149 Geng, N., Wang, J., Xu, Y., Zhang, W., Chen, C., and Zhang, R.: PM<sub>2.5</sub> in an industrial district of Zhengzhou, China: Chemical  
150 composition and source apportionment, *Particuology*, 11, 99-109, 10.1016/j.partic.2012.08.004, 2013.

151 Gu, J., Bai, Z., Li, W., Wu, L., Liu, A., Dong, H., and Xie, Y.: Chemical composition of PM<sub>2.5</sub> during winter in Tianjin, China,  
152 *Particuology*, 9, 215-221, 10.1016/j.partic.2011.03.001, 2011.

153 Hsu, S.-C., Wong, G. T. F., Gong, G.-C., Shiah, F.-K., Huang, Y.-T., Kao, S.-J., Tsai, F., Candice Lung, S.-C., Lin, F.-J., Lin,  
154 I. I., Hung, C.-C., and Tseng, C.-M.: Sources, solubility, and dry deposition of aerosol trace elements over the East China  
155 Sea, *Marine Chemistry*, 120, 116-127, 10.1016/j.marchem.2008.10.003, 2010.

156 Ito, A.: Atmospheric Processing of Combustion Aerosols as a Source of Bioavailable Iron, *Environmental Science &*  
157 *Technology Letters*, 2, 70-75, 10.1021/acs.estlett.5b00007, 2015.

158 Jeon, H.-L., Choi, S.-H., Im, J.-Y., Park, H.-J., Hong, E.-J., and Son, B.-S.: Chemical Characteristics of Heavy Metals of  
159 PM<sub>2.5</sub> in Atmosphere, *Korean Journal of Environmental Health Sciences*, 38, 233-240, 10.5668/JEHS.2012.38.3.233,  
160 2012.

161 Jiang, S. Y. N., Yang, F., Chan, K. L., and Ning, Z.: Water solubility of metals in coarse PM and PM<sub>2.5</sub> in typical urban  
162 environment in Hong Kong, *Atmospheric Pollution Research*, 5, 236-244, 10.5094/APR.2014.029, 2014.

163 Jickells, T. D., Baker, A. R., and Chance, R.: Atmospheric transport of trace elements and nutrients to the oceans, *Philosophical  
164 Transactions of the Royal Society A: Mathematical, Physical and Engineering Sciences*, 374, 20150286,  
165 10.1098/rsta.2015.0286, 2016.

166 Kain, J. S.: The Kain–Fritsch Convective Parameterization: An Update, *Journal of Applied Meteorology*, 43, 170-181,  
167 10.1175/1520-0450(2004)043<0170:TKCPAU>2.0.CO;2, 2004.

168 Karthikeyan, S., Joshi, U. M., and Balasubramanian, R.: Microwave assisted sample preparation for determining water-soluble  
169 fraction of trace elements in urban airborne particulate matter: Evaluation of bioavailability, *Analytica Chimica Acta*, 576,  
170 23-30, 10.1016/j.aca.2006.05.051, 2006.

171 Kurisu, M., Sakata, K., Uematsu, M., Ito, A., and Takahashi, Y.: Contribution of combustion Fe in marine aerosols over the  
172 northwestern Pacific estimated by Fe stable isotope ratios, *Atmos. Chem. Phys.*, 21, 16027-16050, 10.5194/acp-21-  
173 16027-2021, 2021.

174 Li, F., Yang, H., Ayyamperumal, R., and Liu, Y.: Pollution, sources, and human health risk assessment of heavy metals in  
175 urban areas around industrialization and urbanization-Northwest China, *Chemosphere*, 308, 136396,  
176 10.1016/j.chemosphere.2022.136396, 2022.

177 Li, H., Wang, Q. g., Yang, M., Li, F., Wang, J., Sun, Y., Wang, C., Wu, H., and Qian, X.: Chemical characterization and source  
178 apportionment of PM<sub>2.5</sub> aerosols in a megacity of Southeast China, *Atmospheric Research*, 181, 288-299,  
179 10.1016/j.atmosres.2016.07.005, 2016.

180 Li, M., Liu, H., Geng, G., Hong, C., Liu, F., Song, Y., Tong, D., Zheng, B., Cui, H., Man, H., Zhang, Q., and He, K.:  
181 Anthropogenic emission inventories in China: a review, *National Science Review*, 4, 834-866, 10.1093/nsr/nwx150,  
182 2017a.

183 Li, M., Zhang, Q., Kurokawa, J. I., Woo, J. H., He, K., Lu, Z., Ohara, T., Song, Y., Streets, D. G., Carmichael, G. R., Cheng,  
184 Y., Hong, C., Huo, H., Jiang, X., Kang, S., Liu, F., Su, H., and Zheng, B.: MIX: a mosaic Asian anthropogenic emission  
185 inventory under the international collaboration framework of the MICS-Asia and HTAP, *Atmos. Chem. Phys.*, 17, 935-  
186 963, 10.5194/acp-17-935-2017, 2017b.

187 Li, P., Sato, K., Hasegawa, H., Huo, M., Minoura, H., Inomata, Y., Take, N., Yuba, A., Futami, M., Takahashi, T., and Kotake,  
188 Y.: Chemical Characteristics and Source Apportionment of PM<sub>2.5</sub> and Long-Range Transport from Northeast Asia  
189 Continent to Niigata in Eastern Japan, *Aerosol and Air Quality Research*, 18, 938-956, 10.4209/aaqr.2017.05.0181, 2018.

190 Lin, S.-x., Zhang, Z.-l., Xiao, Z.-q., Liu, X.-l., and Zhang, Q.-h.: Atmospheric deposition fluxes and health risk assessment of  
191 potentially toxic elements in Caohai Lake (Guizhou Province, China), *Journal of Mountain Science*, 19, 1107-1118,  
192 10.1007/s11629-021-7170-z, 2022.

193 Liu, B., Song, N., Dai, Q., Mei, R., Sui, B., Bi, X., and Feng, Y.: Chemical composition and source apportionment of ambient  
194 PM<sub>2.5</sub> during the non-heating period in Taian, China, *Atmospheric Research*, 170, 23-33,  
195 10.1016/j.atmosres.2015.11.002, 2016.

196 Liu, G., Li, J., Wu, D., and Xu, H.: Chemical composition and source apportionment of the ambient PM<sub>2.5</sub> in Hangzhou,  
197 China, *Particuology*, 18, 135-143, 10.1016/j.partic.2014.03.011, 2015.

198 Liu, M., Wang, W., Li, J., Wang, T., Xu, Z., Song, Y., Zhang, W., Zhou, L., Lian, C., Yang, J., Li, Y., Sun, Y., Tong, S., Guo,  
199 Y., and Ge, M.: High fraction of soluble trace metals in fine particles under heavy haze in central China, *Science of The*  
200 *Total Environment*, 841, 156771, 10.1016/j.scitotenv.2022.156771, 2022.

201 Liu, S., Tian, H., Zhu, C., Cheng, K., Wang, Y., Luo, L., Bai, X., Hao, Y., Lin, S., Zhao, S., Wang, S., Chu, B., Guo, Z., Lv,  
202 Y., and Hao, J.: Reduced but still noteworthy atmospheric pollution of trace elements in China, *One Earth*, 6, 536-547,  
203 10.1016/j.oneear.2023.04.006, 2023.

204 Luo, H., Wang, Q., Guan, Q., Ma, Y., Ni, F., Yang, E., and Zhang, J.: Heavy metal pollution levels, source apportionment and  
205 risk assessment in dust storms in key cities in Northwest China, *Journal of Hazardous Materials*, 422, 126878,  
206 10.1016/j.jhazmat.2021.126878, 2022.

207 Moldanová, J., Fridell, E., Winnes, H., Holmin-Fridell, S., Boman, J., Jedynska, A., Tishkova, V., Demirdjian, B., Joulie, S.,  
208 Bladt, H., Ivleva, N. P., and Niessner, R.: Physical and chemical characterisation of PM emissions from two ships  
209 operating in European Emission Control Areas, *Atmos. Meas. Tech.*, 6, 3577-3596, 10.5194/amt-6-3577-2013, 2013.

210 Ni, R. and Ma, Y.: Current inventory and changes of the input/output balance of trace elements in farmland across China,  
211 *PLOS ONE*, 13, e0199460, 10.1371/journal.pone.0199460, 2018.

212 Nie, X., Wang, Y., Li, Y., Sun, L., Li, T., Yang, M., Yang, X., and Wang, W.: Characteristics and impacts of trace elements  
213 in atmospheric deposition at a high-elevation site, southern China, *Environmental Science and Pollution Research*, 24,  
214 22839-22851, 10.1007/s11356-017-8791-1, 2017.

215 Nishikawa, M., Batdorj, D., Ukachi, M., Onishi, K., Nagano, K., Mori, I., Matsui, I., and Sano, T.: Preparation and chemical  
216 characterisation of an Asian mineral dust certified reference material, *Analytical Methods*, 5, 4088-4095,  
217 10.1039/C3AY40435H, 2013.

218 Okubo, A., Takeda, S., and Obata, H.: Atmospheric deposition of trace metals to the western North Pacific Ocean observed at  
219 coastal station in Japan, *Atmospheric Research*, 129-130, 20-32, 10.1016/j.atmosres.2013.03.014, 2013.

220 Ooki, A., Nishioka, J., Ono, T., and Noriki, S.: Size dependence of iron solubility of Asian mineral dust particles, *Journal of*  
221 *Geophysical Research: Atmospheres*, 114, 10.1029/2008JD010804, 2009.

222 Pan, Y., Liu, J., Zhang, L., Cao, J., Hu, J., Tian, S., Li, X., and Xu, W.: Bulk Deposition and Source Apportionment of  
223 Atmospheric Heavy Metals and Metalloids in Agricultural Areas of Rural Beijing during 2016–2020, *Atmosphere*, 12,  
224 283, 10.3390/atmos12020283, 2021.

225 Pan, Y. P. and Wang, Y. S.: Atmospheric wet and dry deposition of trace elements at 10 sites in Northern China, *Atmos. Chem.*  
226 *Phys.*, 15, 951-972, 10.5194/acp-15-951-2015, 2015.



227 Peng, H., Chen, Y., Weng, L., Ma, J., Ma, Y., Li, Y., and Islam, M. S.: Comparisons of heavy metal input inventory in  
228 agricultural soils in North and South China: A review, *Science of The Total Environment*, 660, 776-786,  
229 10.1016/j.scitotenv.2019.01.066, 2019.

230 Pleim, J. E.: A Combined Local and Nonlocal Closure Model for the Atmospheric Boundary Layer. Part I: Model Description  
231 and Testing, *Journal of Applied Meteorology and Climatology*, 46, 1383-1395, 10.1175/JAM2539.1, 2007.

232 Sakata, M., Tani, Y., and Takagi, T.: Wet and dry deposition fluxes of trace elements in Tokyo Bay, *Atmospheric Environment*,  
233 42, 5913-5922, 10.1016/j.atmosenv.2008.03.027, 2008.

234 Sippula, O., Stengel, B., Sklorz, M., Streibel, T., Rabe, R., Orasche, J., Lintelmann, J., Michalke, B., Abbaszade, G., Radischat,  
235 C., Gröger, T., Schnelle-Kreis, J., Harndorf, H., and Zimmermann, R.: Particle Emissions from a Marine Engine:  
236 Chemical Composition and Aromatic Emission Profiles under Various Operating Conditions, *Environmental Science &*  
237 *Technology*, 48, 11721-11729, 10.1021/es502484z, 2014.

238 Streibel, T., Schnelle-Kreis, J., Czech, H., Harndorf, H., Jakobi, G., Jokiniemi, J., Karg, E., Lintelmann, J., Matuschek, G.,  
239 Michalke, B., Müller, L., Orasche, J., Passig, J., Radischat, C., Rabe, R., Reda, A., Rüger, C., Schwemer, T., Sippula, O.,  
240 Stengel, B., Sklorz, M., Torvela, T., Weggler, B., and Zimmermann, R.: Aerosol emissions of a ship diesel engine  
241 operated with diesel fuel or heavy fuel oil, *Environmental Science and Pollution Research*, 24, 10976-10991,  
242 10.1007/s11356-016-6724-z, 2017.

243 Tan, J., Zhang, L., Zhou, X., Duan, J., Li, Y., Hu, J., and He, K.: Chemical characteristics and source apportionment of PM<sub>2.5</sub>  
244 in Lanzhou, China, *Science of The Total Environment*, 601-602, 1743-1752, 10.1016/j.scitotenv.2017.06.050, 2017.

245 Tao, J., Zhang, L., Zhang, R., Wu, Y., Zhang, Z., Zhang, X., Tang, Y., Cao, J., and Zhang, Y.: Uncertainty assessment of  
246 source attribution of PM<sub>2.5</sub> and its water-soluble organic carbon content using different biomass burning tracers in  
247 positive matrix factorization analysis — a case study in Beijing, China, *Science of The Total Environment*, 543, 326-335,  
248 10.1016/j.scitotenv.2015.11.057, 2016.

249 Tao, J., Gao, J., Zhang, L., Zhang, R., Che, H., Zhang, Z., Lin, Z., Jing, J., Cao, J., and Hsu, S. C.: PM<sub>2.5</sub> pollution  
250 in a megacity of southwest China: source apportionment and implication, *Atmos. Chem. Phys.*, 14, 8679-8699,  
251 10.5194/acp-14-8679-2014, 2014.

252 Tao, J., Zhang, L., Cao, J., Zhong, L., Chen, D., Yang, Y., Chen, D., Chen, L., Zhang, Z., Wu, Y., Xia, Y., Ye, S., and Zhang,  
253 R.: Source apportionment of PM<sub>2.5</sub> at urban and suburban areas of the Pearl River Delta region, south China - With  
254 emphasis on ship emissions, *Science of The Total Environment*, 574, 1559-1570, 10.1016/j.scitotenv.2016.08.175, 2017.

255 Tian, H. Z., Zhu, C. Y., Gao, J. J., Cheng, K., Hao, J. M., Wang, K., Hua, S. B., Wang, Y., and Zhou, J. R.: Quantitative  
256 assessment of atmospheric emissions of toxic heavy metals from anthropogenic sources in China: historical trend, spatial  
257 distribution, uncertainties, and control policies, *Atmos. Chem. Phys.*, 15, 10127-10147, 10.5194/acp-15-10127-2015,  
258 2015.

259 Wang, J., Hu, Z., Chen, Y., Chen, Z., and Xu, S.: Contamination characteristics and possible sources of PM<sub>10</sub> and PM<sub>2.5</sub> in  
260 different functional areas of Shanghai, China, *Atmospheric Environment*, 68, 221-229, 10.1016/j.atmosenv.2012.10.070,  
261 2013.

262 Wang, K., Tian, H., Hua, S., Zhu, C., Gao, J., Xue, Y., Hao, J., Wang, Y., and Zhou, J.: A comprehensive emission inventory  
263 of multiple air pollutants from iron and steel industry in China: Temporal trends and spatial variation characteristics,  
264 *Science of The Total Environment*, 559, 7-14, 10.1016/j.scitotenv.2016.03.125, 2016.

265 Wang, Q., Ma, Y., Tan, J., Zheng, N., Duan, J., Sun, Y., He, K., and Zhang, Y.: Characteristics of size-fractionated atmospheric  
266 metals and water-soluble metals in two typical episodes in Beijing, *Atmospheric Environment*, 119, 294-303,  
267 10.1016/j.atmosenv.2015.08.061, 2015.

268 Wang, Y., Cheng, K., Wu, W., Tian, H., Yi, P., Zhi, G., Fan, J., and Liu, S.: Atmospheric emissions of typical toxic heavy  
269 metals from open burning of municipal solid waste in China, *Atmospheric Environment*, 152, 6-15,  
270 10.1016/j.atmosenv.2016.12.017, 2017.

271 Wei, Z., Wang, L. T., Chen, M. Z., and Zheng, Y.: The 2013 severe haze over the Southern Hebei, China: PM<sub>2.5</sub> composition  
272 and source apportionment, *Atmospheric Pollution Research*, 5, 759-768, 10.5094/APR.2014.085, 2014.

273 Wong, C. S. C., Li, X. D., Zhang, G., Qi, S. H., and Peng, X. Z.: Atmospheric deposition of heavy metals in the Pearl River  
274 Delta, China, *Atmospheric Environment*, 37, 767-776, 10.1016/S1352-2310(02)00929-9, 2003.

275 Wu, Y., Zhang, J., Ni, Z., Liu, S., Jiang, Z., and Huang, X.: Atmospheric deposition of trace elements to Daya Bay, South  
276 China Sea: Fluxes and sources, *Marine Pollution Bulletin*, 127, 672-683, 10.1016/j.marpolbul.2017.12.046, 2018.

277 Xiu, A. and Pleim, J. E.: Development of a Land Surface Model. Part I: Application in a Mesoscale Meteorological Model,  
278 *Journal of Applied Meteorology*, 40, 192-209, 10.1175/1520-0450(2001)040<0192:DOALSM>2.0.CO;2, 2001.

279 Zetterdahl, M., Moldanová, J., Pei, X., Pathak, R. K., and Demirdjian, B.: Impact of the 0.1% fuel sulfur content limit in SECA  
280 on particle and gaseous emissions from marine vessels, *Atmospheric Environment*, 145, 338-345,  
281 10.1016/j.atmosenv.2016.09.022, 2016.

282 Zhang, F., Chen, Y., Tian, C., Lou, D., Li, J., Zhang, G., and Matthias, V.: Emission factors for gaseous and particulate  
283 pollutants from offshore diesel engine vessels in China, *Atmos. Chem. Phys.*, 16, 6319-6334, 10.5194/acp-16-6319-2016,  
284 2016.

285 Zhang, F., Chen, Y., Tian, C., Wang, X., Huang, G., Fang, Y., and Zong, Z.: Identification and quantification of shipping  
286 emissions in Bohai Rim, China, *Science of The Total Environment*, 497-498, 570-577, 10.1016/j.scitotenv.2014.08.016,  
287 2014.

288 Zhang, F., Wang, Z.-w., Cheng, H.-r., Lv, X.-p., Gong, W., Wang, X.-m., and Zhang, G.: Seasonal variations and chemical  
289 characteristics of PM<sub>2.5</sub> in Wuhan, central China, *Science of The Total Environment*, 518-519, 97-105,  
290 10.1016/j.scitotenv.2015.02.054, 2015.

291 Zhang, F., Chen, Y., Chen, Q., Feng, Y., shang, Y., Yang, X., Gao, H., Tian, C., Li, J., Zhang, G., Matthias, V., and Xie, Z.:  
292 Real-World Emission Factors of Gaseous and Particulate Pollutants from Marine Fishing Boats and Their Total Emissions  
293 in China, *Environmental Science & Technology*, 52, 4910-4919, 10.1021/acs.est.7b04002, 2018a.

294 Zhang, J., Zhou, X., Wang, Z., Yang, L., Wang, J., and Wang, W.: Trace elements in PM<sub>2.5</sub> in Shandong Province: Source  
295 identification and health risk assessment, *Science of The Total Environment*, 621, 558-577,  
296 10.1016/j.scitotenv.2017.11.292, 2018b.

297 Zhao, J., Zhang, Y., Xu, H., Tao, S., Wang, R., Yu, Q., Chen, Y., Zou, Z., and Ma, W.: Trace Elements From Ocean-Going  
298 Vessels in East Asia: Vanadium and Nickel Emissions and Their Impacts on Air Quality, *Journal of Geophysical Research:*  
299 *Atmospheres*, 126, e2020JD033984, 10.1029/2020JD033984, 2021.

300 Zheng, B., Zhang, Q., Geng, G., Chen, C., Shi, Q., Cui, M., Lei, Y., and He, K.: Changes in China's anthropogenic emissions  
301 and air quality during the COVID-19 pandemic in 2020, *Earth Syst. Sci. Data*, 13, 2895-2907, 10.5194/essd-13-2895-  
302 2021, 2021.

303 Zheng, B., Tong, D., Li, M., Liu, F., Hong, C., Geng, G., Li, H., Li, X., Peng, L., Qi, J., Yan, L., Zhang, Y., Zhao, H., Zheng,  
304 Y., He, K., and Zhang, Q.: Trends in China's anthropogenic emissions since 2010 as the consequence of clean air actions,  
305 *Atmos. Chem. Phys.*, 18, 14095-14111, 10.5194/acp-18-14095-2018, 2018.

306 Zhuang, M.: Characteristic of elements in PM<sub>2.5</sub> and health risk assessment of heavy metals at Xiamen, *Environmental*  
307 *Chemistry*, 35, 1723-1732, 10.7524/j.issn.0254-6108.2016.08.2016032803, 2016.

308 Zou, Z., Zhao, J., Zhang, C., Zhang, Y., Yang, X., Chen, J., Xu, J., Xue, R., and Zhou, B.: Effects of cleaner ship fuels on air  
309 quality and implications for future policy: A case study of Chongming Ecological Island in China, *Journal of Cleaner*  
310 *Production*, 267, 122088, 10.1016/j.jclepro.2020.122088, 2020.

311
